# Supplementary material
Source: PubMed Central journal article supplement (PMC3808935)
Supplement: ajcei0002-0222-f6.pdf [file ajcei0002-0222-f6.pdf]

## Treg origin in pregnancy

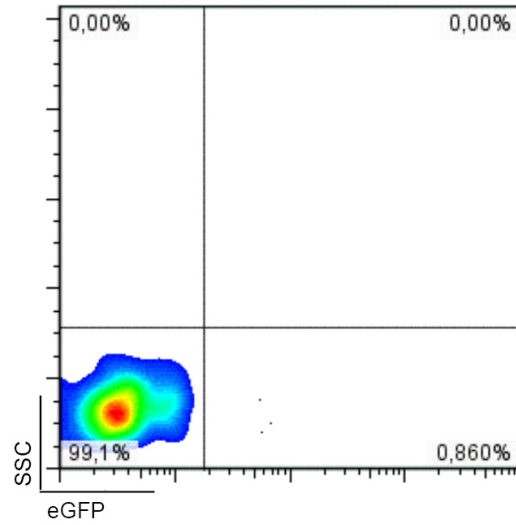

**Figure S1.** Purity of the eGFP sorted cells used for reconstitution of the Rag-1<sup>-/-</sup> mice.

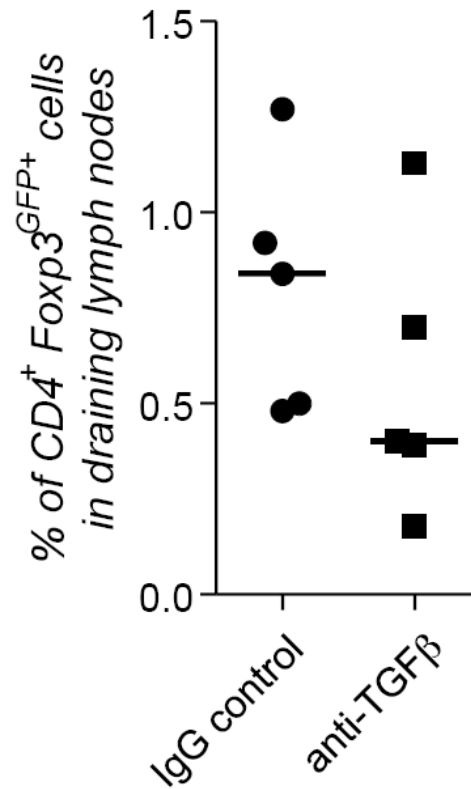

**Figure S2.** Anti-TGF- $\beta$  affected the expansion of splenic Tregs but did not show any effect on the population of Tregs in the draining lymph nodes during pregnancy. A neutralizing antibody against TGF- $\beta$  was injected subcutaneously in pregnant reconstituted Rag1<sup>-/-</sup> on day 0 and day 7 of pregnancy. As a control group animals were injected with anti-IgG. The percentage of CD4<sup>+</sup>Foxp3<sup>GFP+</sup> cells was analyzed in the uterine draining lymph nodes on day 12 of pregnancy (d12). (n=5). Data are expressed as single dots with medians and were analyzed by using the Mann-Whitney-U test.
